# Supplementary material for: Separate mechanisms of ion oligomerization tune the physicochemical properties of n-butylammonium acetate: cation-base clusters vs. anion-acid dimers
Source: Royal Society of Chemistry journal article supplement (doi:10.1039/c7cp04078d), 2017-01-01
Supplement: c7cp04078d1.pdf [file c7cp04078d1.pdf]

## Separate Mechanisms of Ion Oligomerization Tune the Physicochemical Properties of n-Butylammonium Acetate: Cation-Base Clusters vs. Anion-Acid Dimers

Paula Berton,<sup>a</sup> Steven P. Kelley,<sup>a</sup> Hui Wang,<sup>b</sup> Allan S. Myerson,<sup>c</sup> and Robin D. Rogers<sup>a,d,\*</sup>

<sup>a</sup>Department of Chemistry, McGill University, 801 Sherbrooke St. West, Montreal, QC H3A 0B8, Canada; <sup>b</sup>Institute of Process Engineering, Chinese Academy of Sciences, Beijing 100190, China; <sup>c</sup>Novartis-MIT Center for Continuous Manufacturing and Department of Chemical Engineering, Massachusetts Institute of Technology, Cambridge, MA 02139, USA; <sup>d</sup>525 Solutions, Inc., 720 2nd Street, Tuscaloosa, AL 35401, USA.

### 1. Thermal data for [C<sub>4</sub>NH<sub>3</sub>][OAc]

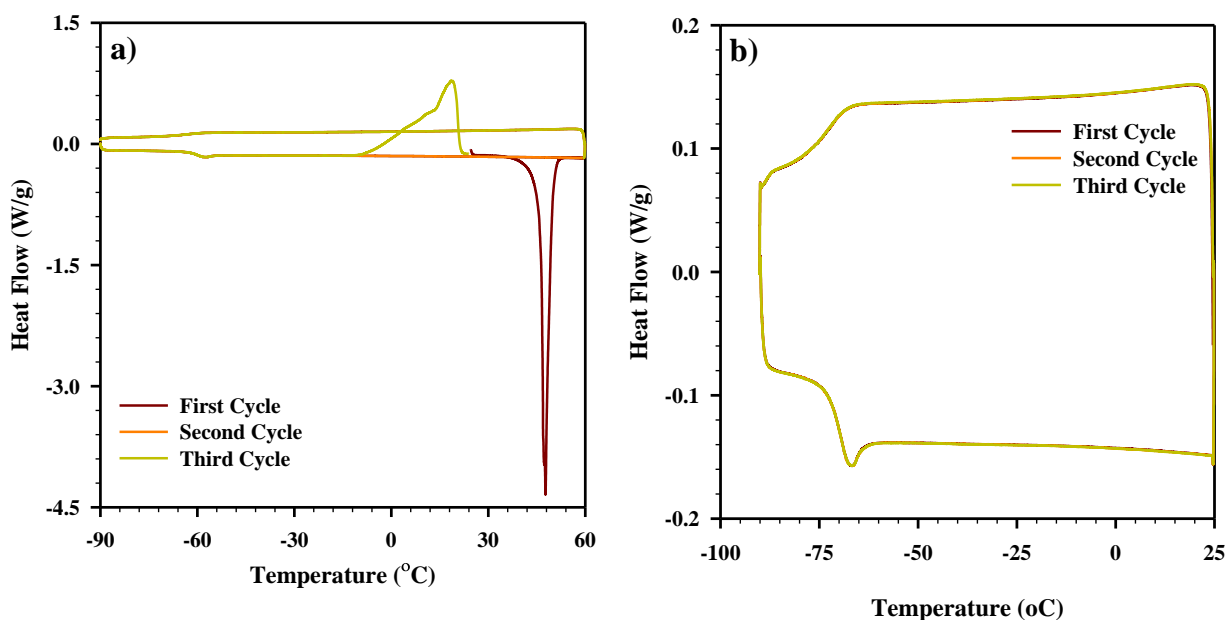

**Figure S1.** DSC of **a)** crystalline [C<sub>4</sub>NH<sub>3</sub>][OAc], and **b)** liquid [C<sub>4</sub>NH<sub>3</sub>][OAc]. Dark brown line: First cycle; Orange line: Second cycle; Lime green line: Third cycle.

\*Corresponding author: Email: [robin.rogers@mcgill.ca](mailto:robin.rogers@mcgill.ca)

## Tuning the Physicochemical Properties of n-Butylammonium Acetate through Ion Oligomerization

## 2. Water content of the mixtures

Table S1. Water content of the mixtures.

| Mole fraction of HOAc or C <sub>4</sub> NH <sub>2</sub> ( $\chi$ ) in the mixtures | Mixtures of [C <sub>4</sub> NH <sub>3</sub> ][OAc] + HOAc |                                | Mixtures of [C <sub>4</sub> NH <sub>3</sub> ][OAc] + C <sub>4</sub> NH <sub>2</sub> |                                |
|------------------------------------------------------------------------------------|-----------------------------------------------------------|--------------------------------|-------------------------------------------------------------------------------------|--------------------------------|
|                                                                                    | Water content (ppm)                                       | Mole of water per mole mixture | Water content (ppm)                                                                 | Mole of water per mole mixture |
| 0                                                                                  | 3687.3                                                    | 0.027                          | 4147.5                                                                              | 0.030                          |
| 0.10                                                                               | 4307.8                                                    | 0.030                          | 5147.9                                                                              | 0.036                          |
| 0.20                                                                               | 4768.0                                                    | 0.031                          | 4645.2                                                                              | 0.031                          |
| 0.33                                                                               | 4384.2                                                    | 0.027                          | 5017.4                                                                              | 0.032                          |
| 0.50                                                                               | 4542.3                                                    | 0.024                          | 4573.3                                                                              | 0.026                          |
| 0.67                                                                               | 3627.4                                                    | 0.017                          | 3689.6                                                                              | 0.019                          |
| 0.80                                                                               | 3072.9                                                    | 0.013                          | 3113.4                                                                              | 0.015                          |
| 0.90                                                                               | 2665.9                                                    | 0.010                          | 2734.9                                                                              | 0.012                          |
| 1.0                                                                                | 1165.0                                                    | 0.004                          | 1018.1                                                                              | 0.004                          |

## 3. Thermal data of the mixtures

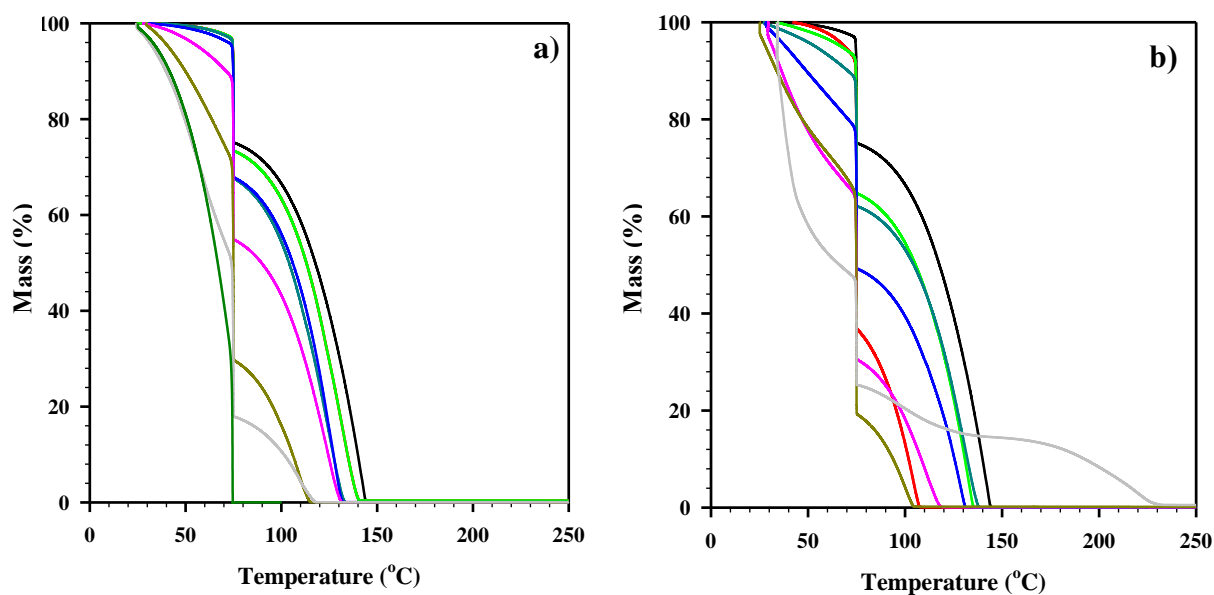

Figure S2. TGA of the mixtures of a) [C<sub>4</sub>NH<sub>3</sub>][OAc] + HOAc, and b) [C<sub>4</sub>NH<sub>3</sub>][OAc] + C<sub>4</sub>NH<sub>2</sub>, with  $\chi = 0$  ([C<sub>4</sub>NH<sub>3</sub>][OAc]), **0.10**, **0.20**, **0.33**, **0.50**, **0.67**, **0.80**, **0.90**, and **1.0**.

## Tuning the Physicochemical Properties of n-Butylammonium Acetate through Ion Oligomerization

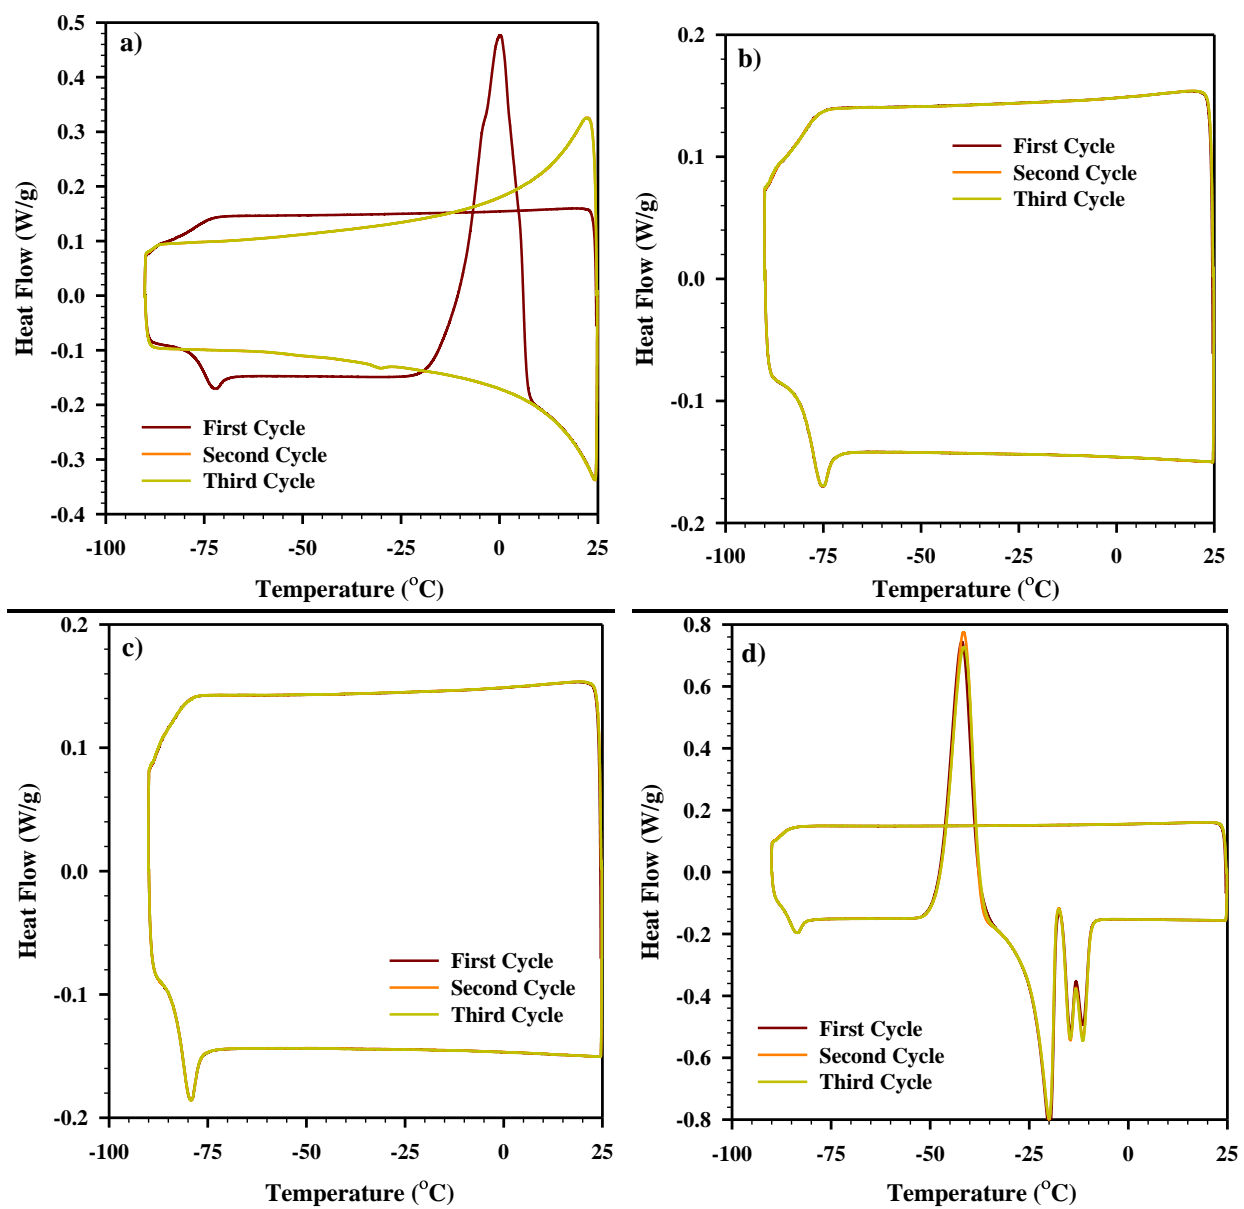

**Figure S3.** DSC of [C<sub>4</sub>NH<sub>3</sub>][OAc] + HOAc **a)**  $\chi_{\text{HOAc}}=0.1$ , **b)**  $\chi_{\text{HOAc}}=0.2$ , **c)**  $\chi_{\text{HOAc}}=0.33$ , and **d)**  $\chi_{\text{HOAc}}=0.5$ . Dark brown line: First cycle; Orange line: Second cycle; Lime green line: Third cycle.

## Tuning the Physicochemical Properties of n-Butylammonium Acetate through Ion Oligomerization

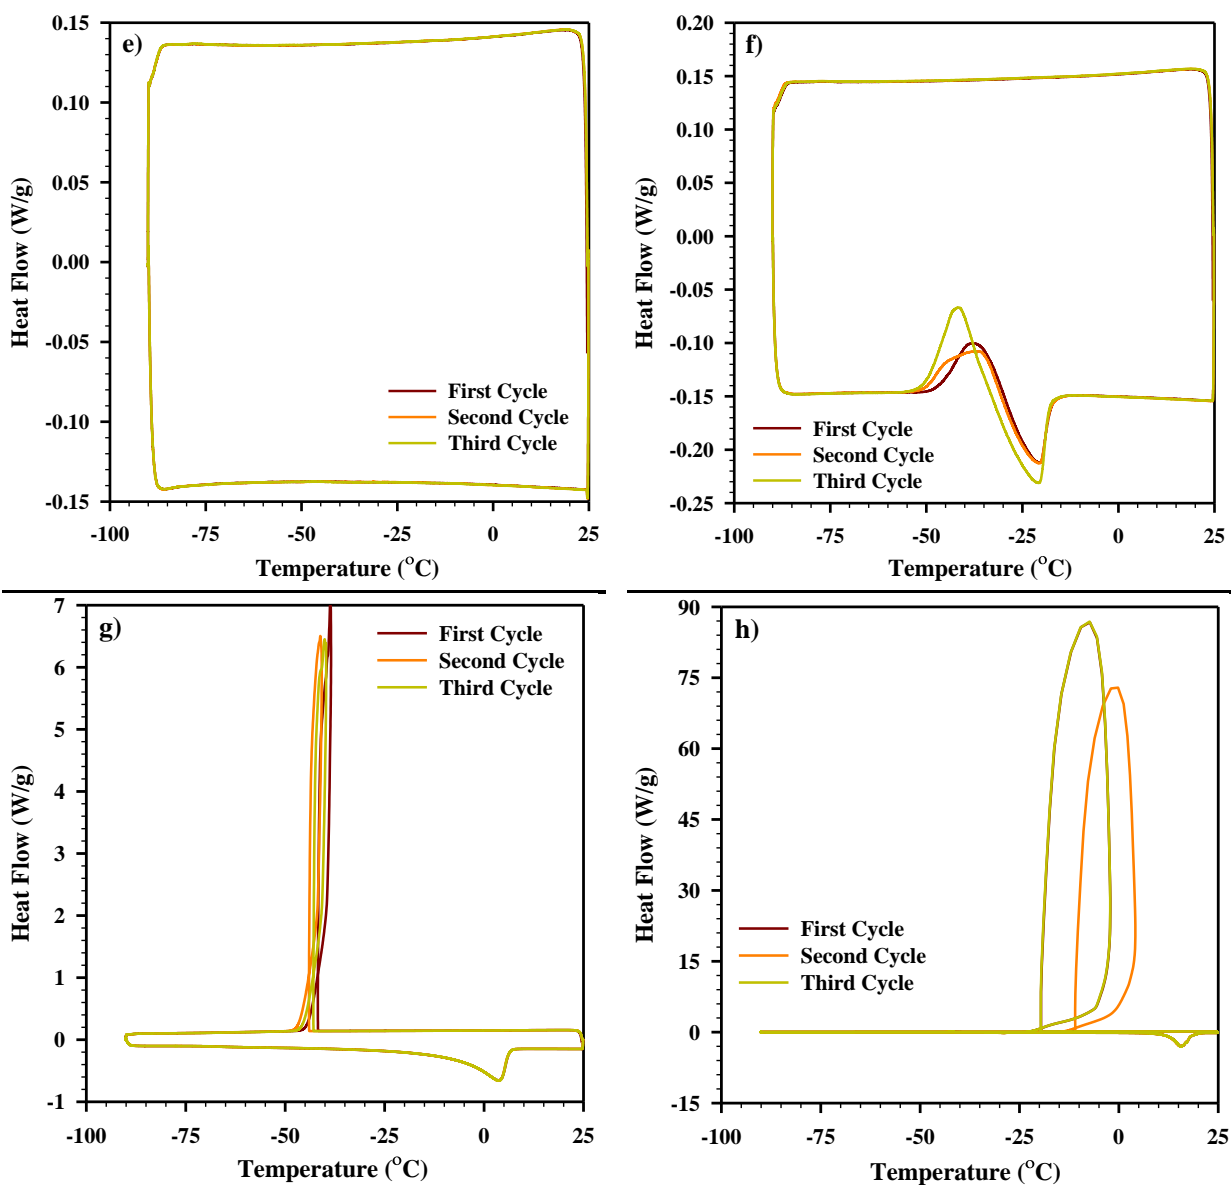

**Figure S3 (cont.).** DSC of [C<sub>4</sub>NH<sub>3</sub>][OAc] + HOAc **e)**  $\chi_{\text{HOAc}}=0.67$ , **f)**  $\chi_{\text{HOAc}}=0.8$ , **g)**  $\chi_{\text{HOAc}}=0.9$ , and **h)** HOAc ( $\chi_{\text{HOAc}}=1$ ). Dark brown line: First cycle; Orange line: Second cycle; Lime green line: Third cycle.

## Tuning the Physicochemical Properties of n-Butylammonium Acetate through Ion Oligomerization

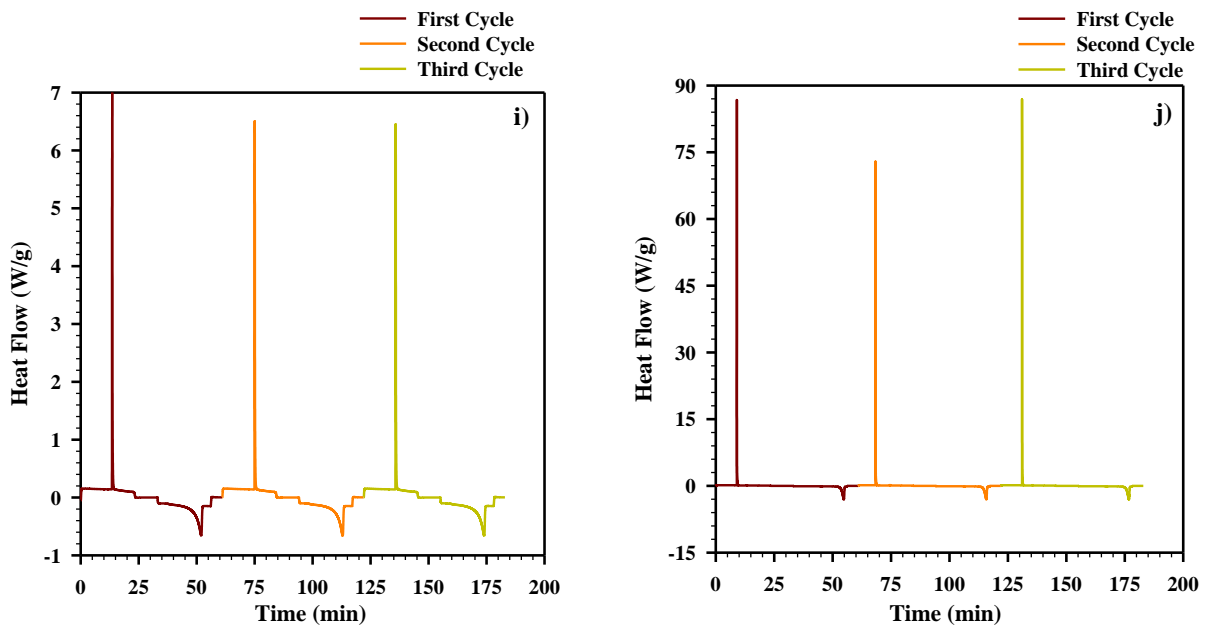

**Figure S3 (cont.).** Heat Flow of [C<sub>4</sub>NH<sub>3</sub>][OAc] + HOAc vs. time **i)**  $\chi_{\text{HOAc}}=0.9$ , and **j)** HOAc ( $\chi_{\text{HOAc}}=1$ ). Dark brown line: First cycle; Orange line: Second cycle; Lime green line: Third cycle.

## Tuning the Physicochemical Properties of n-Butylammonium Acetate through Ion Oligomerization

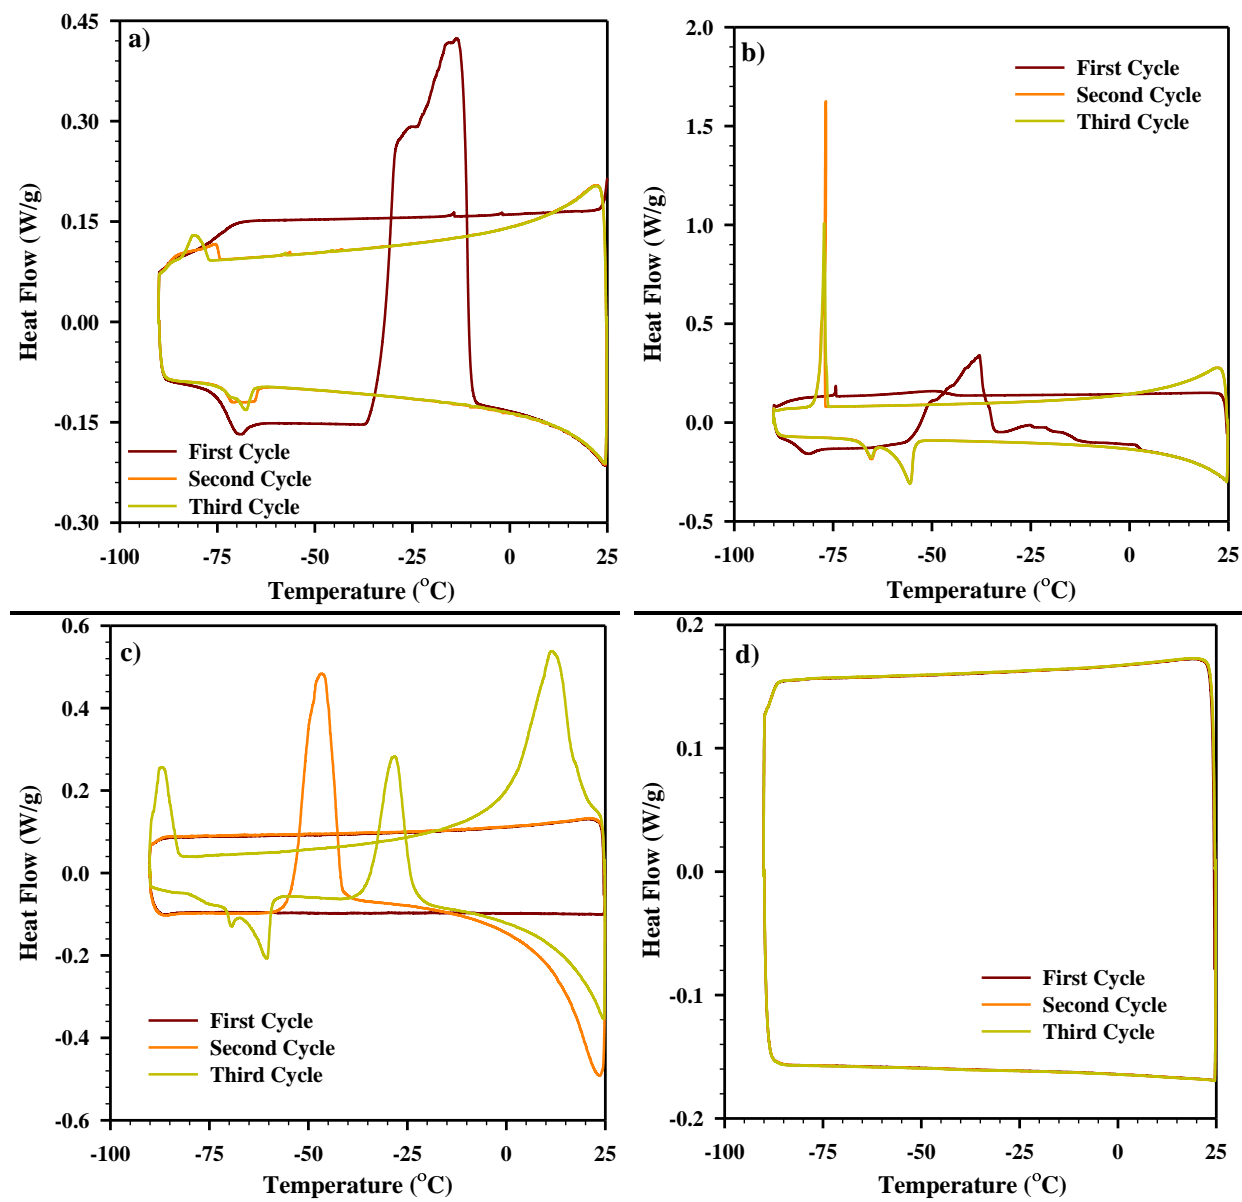

**Figure S4.** DSC of  $[C_4NH_3][OAc] + C_4NH_2$  a)  $\chi_{C_4NH_2} = 0.1$ , b)  $\chi_{C_4NH_2} = 0.2$ , c)  $\chi_{C_4NH_2} = 0.33$ , and d)  $\chi_{C_4NH_2} = 0.5$ . Dark brown line: First cycle; Orange line: Second cycle; Lime green line: Third cycle.

## Tuning the Physicochemical Properties of n-Butylammonium Acetate through Ion Oligomerization

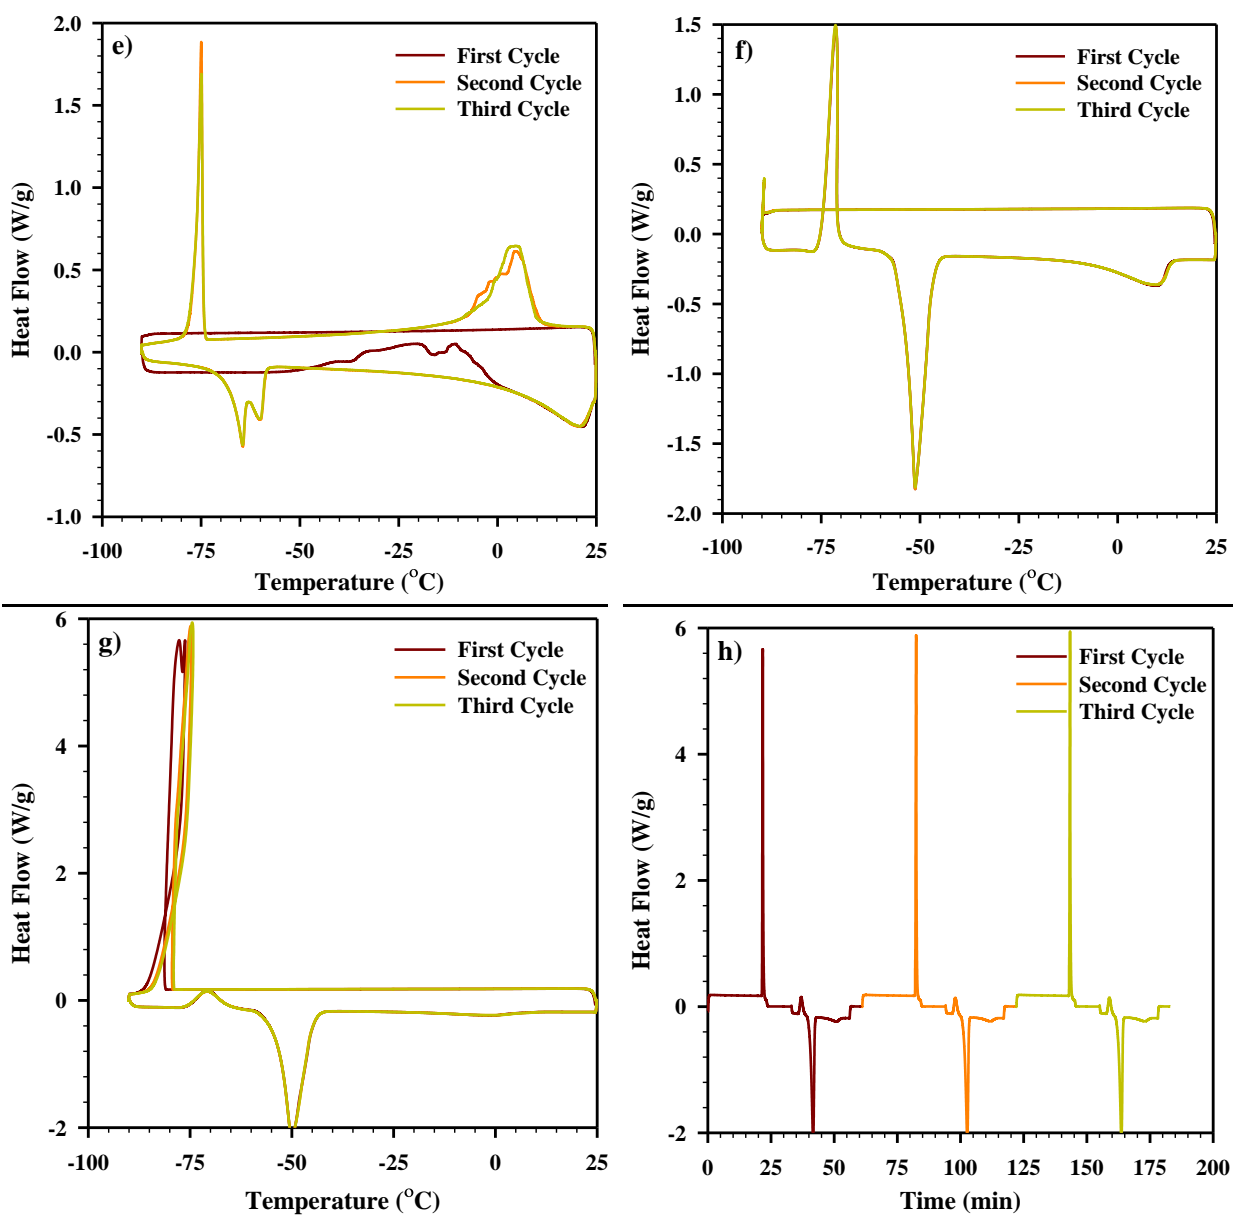

**Figure S4 (cont.).** DSC of  $[\text{C}_4\text{NH}_3][\text{OAc}] + \text{C}_4\text{NH}_2$  **e)**  $\chi_{\text{C}_4\text{NH}_2} = 0.67$ , **f)**  $\chi_{\text{C}_4\text{NH}_2} = 0.8$ , and **g)**  $\chi_{\text{C}_4\text{NH}_2} = 0.9$ . (The DSC of  $\text{C}_4\text{NH}_2$  ( $\chi_{\text{C}_4\text{NH}_2} = 1$ ) was not recorded due to its volatility at room temperature).

**h)** Heat Flow of  $[\text{C}_4\text{NH}_3][\text{OAc}] + \text{C}_4\text{NH}_2$  ( $\chi_{\text{C}_4\text{NH}_2} = 0.9$ ) vs. time. Dark brown line: First cycle; Orange line: Second cycle; Lime green line: Third cycle.

## Tuning the Physicochemical Properties of n-Butylammonium Acetate through Ion Oligomerization

4.  $^1\text{H}$  NMR spectra $[\text{C}_4\text{NH}_3][\text{OAc}] + \text{HOAc}$  system: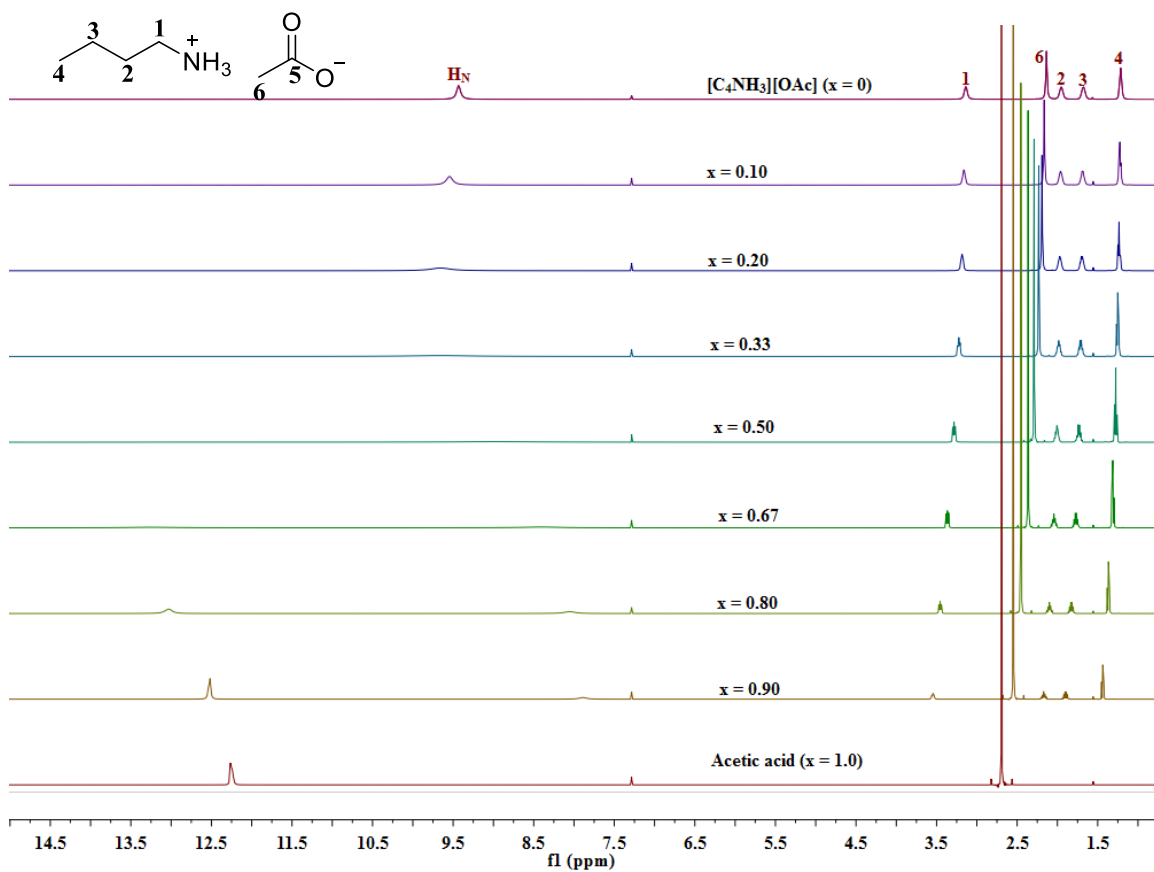

**Figure S5.**  $^1\text{H}$  NMR spectra of the mixtures of  $[\text{C}_4\text{NH}_3][\text{OAc}] + \text{HOAc}$  using  $\text{CDCl}_3$  as external lock at 25 °C ( $\text{H}_\text{N}$  represents the protons on nitrogen).



## Tuning the Physicochemical Properties of n-Butylammonium Acetate through Ion Oligomerization

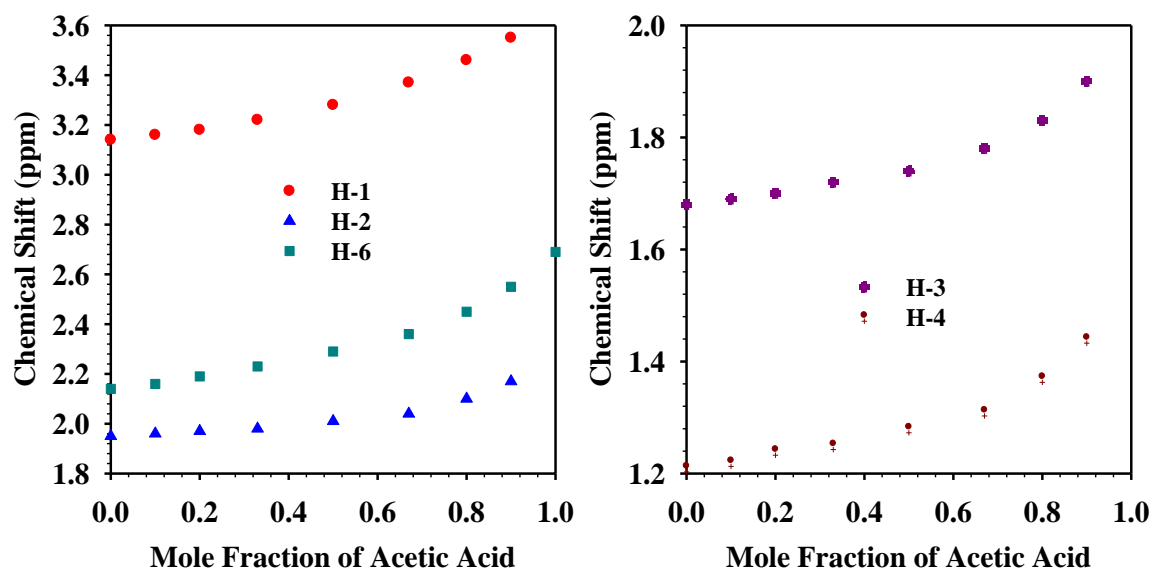

**Figure S6.**  $^1\text{H}$  NMR chemical shifts of H-1, H-2, H-3, H-4, and H-6 of the  $[\text{C}_4\text{NH}_3][\text{OAc}] + \text{HOAc}$  mixtures as a function of HOAc concentration.

## Tuning the Physicochemical Properties of n-Butylammonium Acetate through Ion Oligomerization

 $[C_4NH_3][OAc] + C_4NH_2$  system: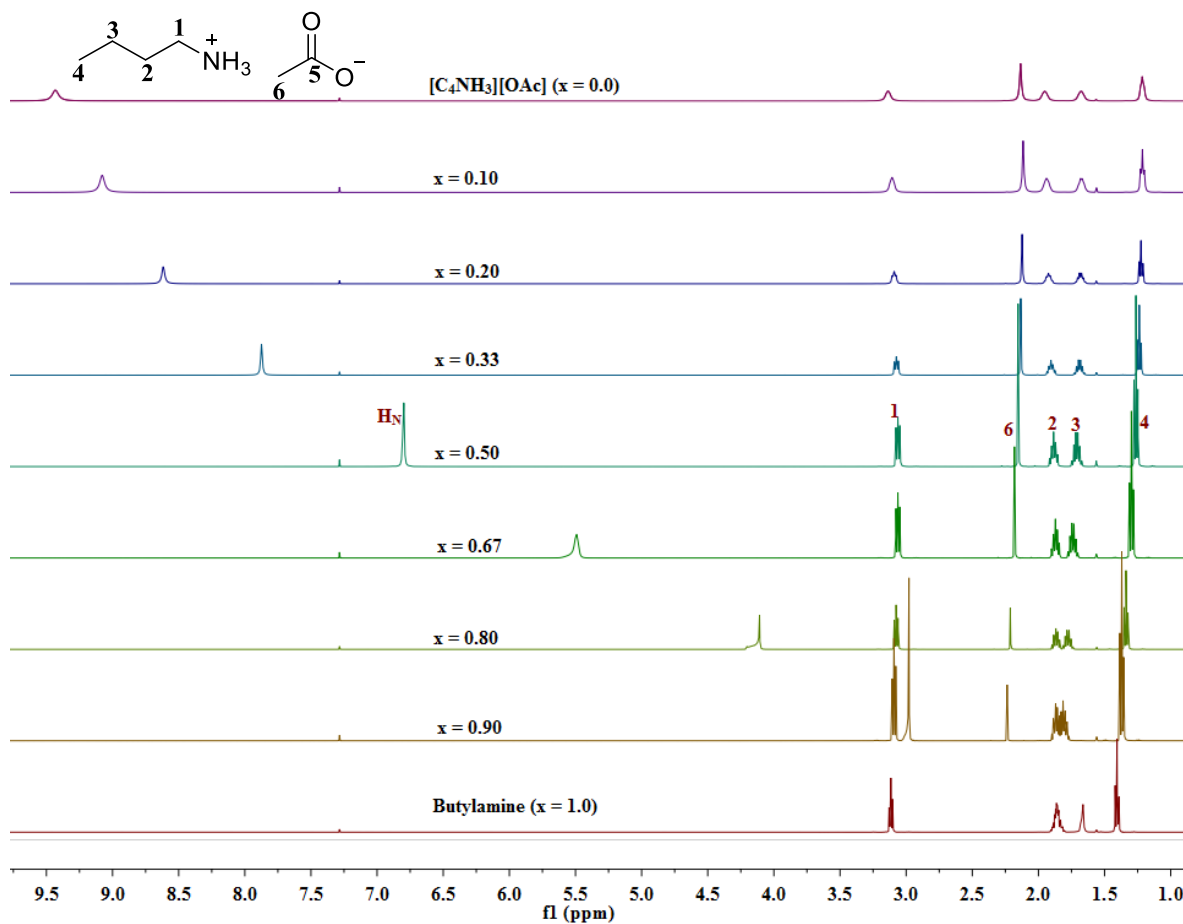

**Figure S7.**  $^1H$  NMR spectra of the mixtures of  $[C_4NH_3][OAc] + C_4NH_2$  using  $CDCl_3$  as external lock at 25 °C ( $H_N$  represents the protons on nitrogen).

## Tuning the Physicochemical Properties of n-Butylammonium Acetate through Ion Oligomerization

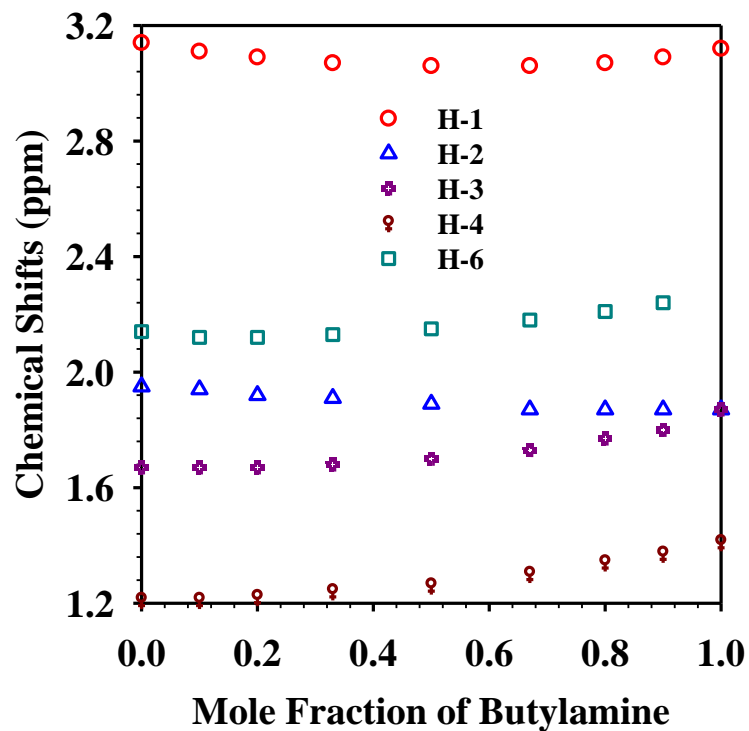

**Figure S8.**  $^1\text{H}$  NMR chemical shifts of H-1, H-2, H-3, H-4, and H-6 of the  $[\text{C}_4\text{NH}_3][\text{OAc}] + \text{C}_4\text{NH}_2$  mixtures as a function of  $\text{C}_4\text{NH}_2$  concentration.

## 5. FT-IR spectra

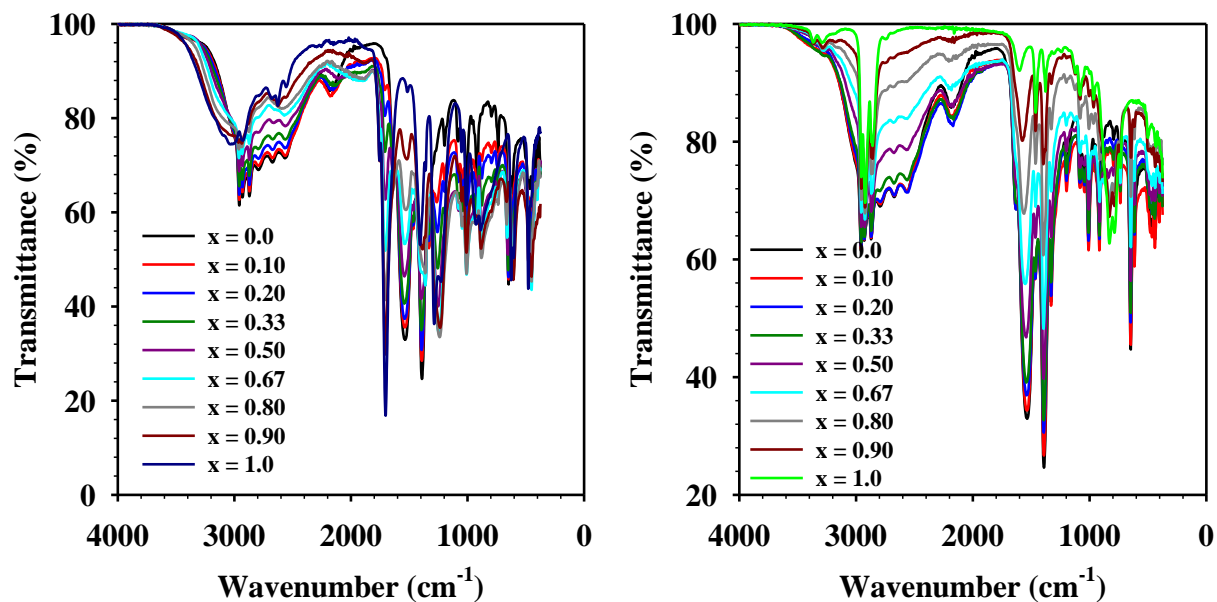

**Figure S9.** FT-IR spectra of the mixtures of  $[\text{C}_4\text{NH}_3][\text{OAc}] + \text{HOAc}$  (left) and the mixtures of  $[\text{C}_4\text{NH}_3][\text{OAc}] + \text{C}_4\text{NH}_2$  (right). ( $x$  in the legends represents mole fraction of HOAc or  $\text{C}_4\text{NH}_2$  in the mixtures.)

## Tuning the Physicochemical Properties of n-Butylammonium Acetate through Ion Oligomerization

## 6. Solubilities of organics and pharmaceuticals in the mixtures

Table S2. Solubilities of organics in the mixtures.

| $\chi$      | Solubilities (mol/mol mixture)                          |          |         |                   |                                                                                   |          |          |                   |
|-------------|---------------------------------------------------------|----------|---------|-------------------|-----------------------------------------------------------------------------------|----------|----------|-------------------|
|             | [C <sub>4</sub> NH <sub>3</sub> ][OAc] + HOAc mixtures* |          |         |                   | [C <sub>4</sub> NH <sub>3</sub> ][OAc] + C <sub>4</sub> NH <sub>2</sub> mixtures* |          |          |                   |
|             | Benzene                                                 | EtOAc    | Heptane | Et <sub>2</sub> O | Benzene                                                                           | EtOAc    | Heptane  | Et <sub>2</sub> O |
| <b>0</b>    | 0.93                                                    | 0.65     | 0.05    | 0.31              | 0.93                                                                              | 0.65     | 0.05     | 0.31              |
| <b>0.10</b> | 1.54                                                    | 0.88     | 0.06    | 0.67              | 1.13                                                                              | 0.66     | 0.13     | 0.38              |
| <b>0.20</b> | 2.96                                                    | 2.61     | 0.06    | 0.80              | 1.43                                                                              | 0.76     | 0.15     | 0.45              |
| <b>0.33</b> | Miscible                                                | Miscible | 0.07    | 1.25              | 2.02                                                                              | 1.20     | 0.16     | 0.52              |
| <b>0.50</b> | Miscible                                                | Miscible | 0.08    | 8.66              | 3.43                                                                              | 1.65     | 0.24     | 0.79              |
| <b>0.67</b> | Miscible                                                | Miscible | 0.07    | Miscible          | 11.99                                                                             | 2.97     | 0.43     | 1.32              |
| <b>0.80</b> | Miscible                                                | Miscible | 0.05    | Miscible          | Miscible                                                                          | 6.88     | 0.74     | 1.99              |
| <b>0.90</b> | Miscible                                                | Miscible | 0.06    | Miscible          | Miscible                                                                          | Miscible | 1.29     | 3.46              |
| <b>1.0</b>  | Miscible                                                | Miscible | 0.12    | Miscible          | Miscible                                                                          | Miscible | Miscible | Miscible          |

\*Miscible: The solution was still clear when the mole ratio of the organic solvent to the IL mixture reached 25:1. *Abbreviations:* EtOAc: ethyl acetate; Et<sub>2</sub>O: diethyl ether.

Table S3. Solubilities of active pharmaceutical ingredients in the mixtures.

| $\chi$      | Solubilities (mol/mol mixture)                          |                              |                                   |                                                    |                                                                                   |                                                        |                                   |                                                                                                         |
|-------------|---------------------------------------------------------|------------------------------|-----------------------------------|----------------------------------------------------|-----------------------------------------------------------------------------------|--------------------------------------------------------|-----------------------------------|---------------------------------------------------------------------------------------------------------|
|             | [C <sub>4</sub> NH <sub>3</sub> ][OAc] + HOAc mixtures* |                              |                                   |                                                    | [C <sub>4</sub> NH <sub>3</sub> ][OAc] + C <sub>4</sub> NH <sub>2</sub> mixtures* |                                                        |                                   |                                                                                                         |
|             | IL<br>(mol/mol<br>mixture)                              | HOAc<br>(mol/mol<br>mixture) | Ibuprofen<br>(mol/mol<br>mixture) | HOAc +<br>Ibuprofen (mol<br>Ibu+HOAc/mol<br>[OAc]) | IL<br>(mol/mol<br>mixture)                                                        | C <sub>4</sub> NH <sub>2</sub><br>(mol/mol<br>mixture) | Lidocaine<br>(mol/mol<br>mixture) | C <sub>4</sub> NH <sub>2</sub> +<br>Lidocaine<br>(mol Lid+<br>C <sub>4</sub> NH <sub>2</sub> /mol base) |
| <b>0</b>    | 1                                                       | <b>0</b>                     | 0.15                              | 0.15                                               | 1                                                                                 | <b>0</b>                                               | 0.06                              | 0.06                                                                                                    |
| <b>0.10</b> | 0.9                                                     | <b>0.10</b>                  | 0.80                              | 0.9                                                | 0.9                                                                               | <b>0.10</b>                                            | 0.08                              | 0.18                                                                                                    |
| <b>0.20</b> | 0.8                                                     | <b>0.20</b>                  | 1.37                              | 1.57                                               | 0.8                                                                               | <b>0.20</b>                                            | 0.10                              | 0.3                                                                                                     |
| <b>0.33</b> | 0.67                                                    | <b>0.33</b>                  | 1.04                              | 1.37                                               | 0.67                                                                              | <b>0.33</b>                                            | 0.13                              | 0.46                                                                                                    |
| <b>0.50</b> | 0.5                                                     | <b>0.50</b>                  | 0.72                              | 1.22                                               | 0.5                                                                               | <b>0.50</b>                                            | 0.28                              | 0.78                                                                                                    |
| <b>0.67</b> | 0.33                                                    | <b>0.67</b>                  | 0.43                              | 1.1                                                | 0.33                                                                              | <b>0.67</b>                                            | 0.45                              | 1.12                                                                                                    |
| <b>0.80</b> | 0.2                                                     | <b>0.80</b>                  | 0.21                              | 1.01                                               | 0.2                                                                               | <b>0.80</b>                                            | 0.68                              | 1.48                                                                                                    |
| <b>0.90</b> | 0.1                                                     | <b>0.90</b>                  | 0.19                              | 1.09                                               | 0.1                                                                               | <b>0.90</b>                                            | 0.78                              | 1.68                                                                                                    |
| <b>1.0</b>  | 0                                                       | <b>1.0</b>                   | 0.23                              | 1.23                                               | 0                                                                                 | <b>1.0</b>                                             | 0.93                              | 1.93                                                                                                    |

## Tuning the Physicochemical Properties of n-Butylammonium Acetate through Ion Oligomerization

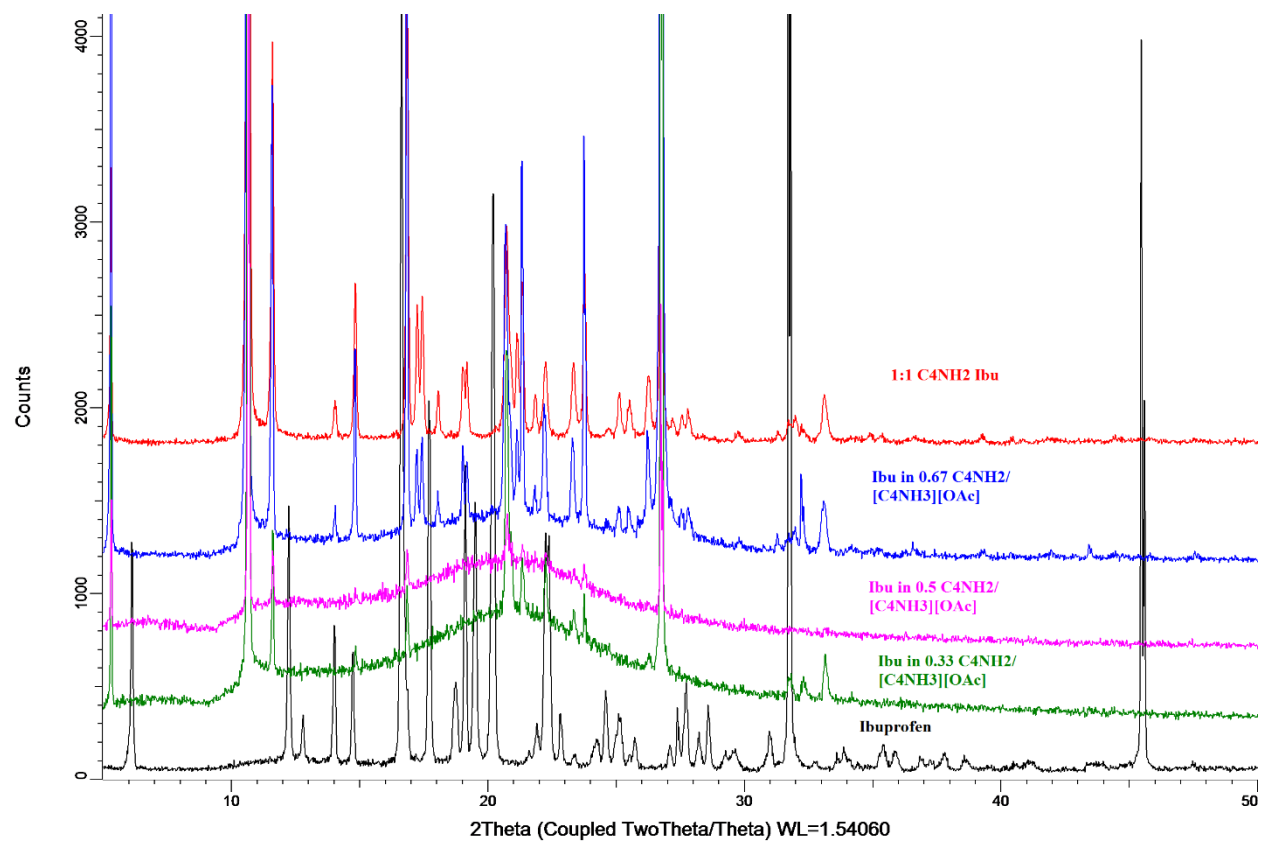

**Figure S10.** PXRD diffractograms of solids obtained when ibuprofen was added to  $[\text{C}_4\text{NH}_3]$  or to mixtures of  $[\text{C}_4\text{NH}_3][\text{OAc}] + \text{C}_4\text{NH}_2$ .

## Tuning the Physicochemical Properties of n-Butylammonium Acetate through Ion Oligomerization

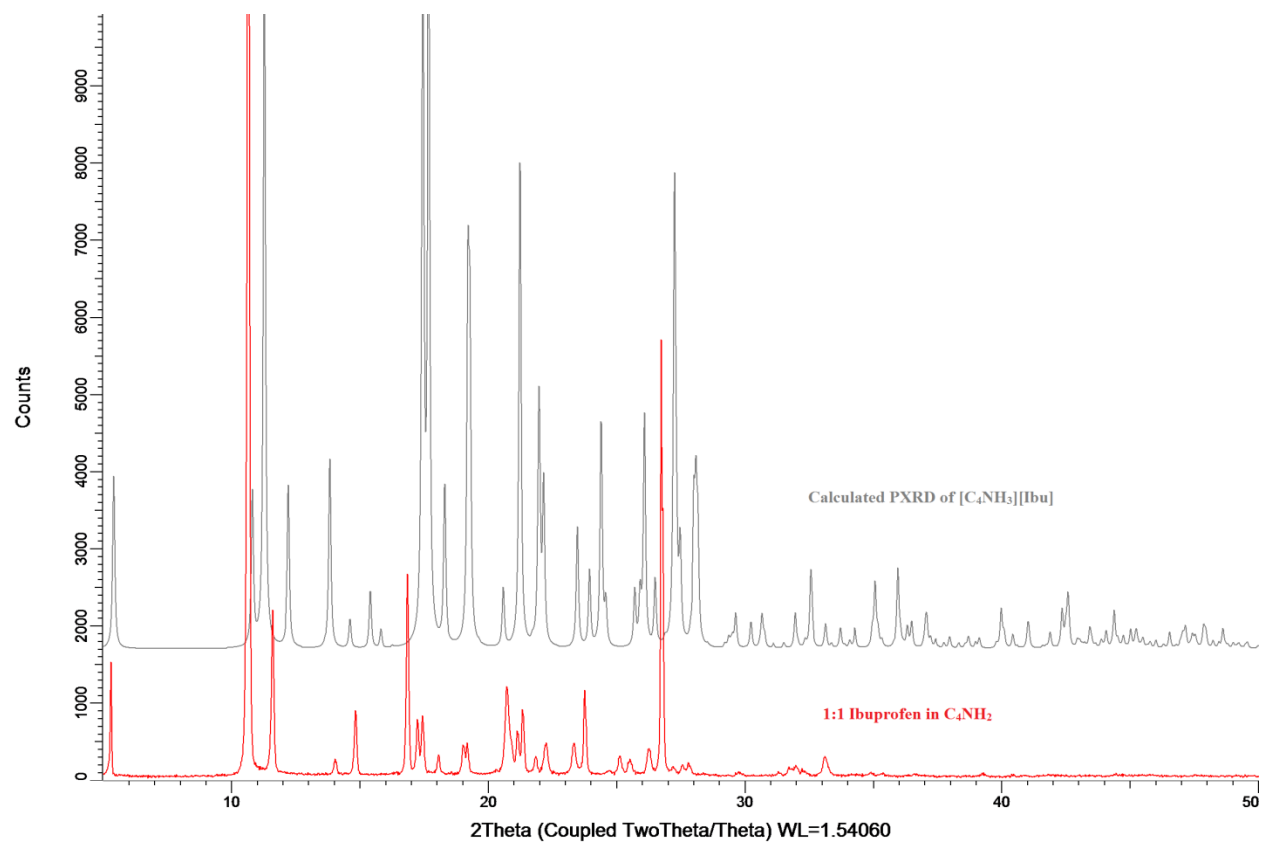

**Figure S11.** Comparison of measured PXRD of 1:1 C<sub>4</sub>NH<sub>2</sub> + Ibuprofen with calculated PXRD pattern of [C<sub>4</sub>NH<sub>3</sub>][Ibu].

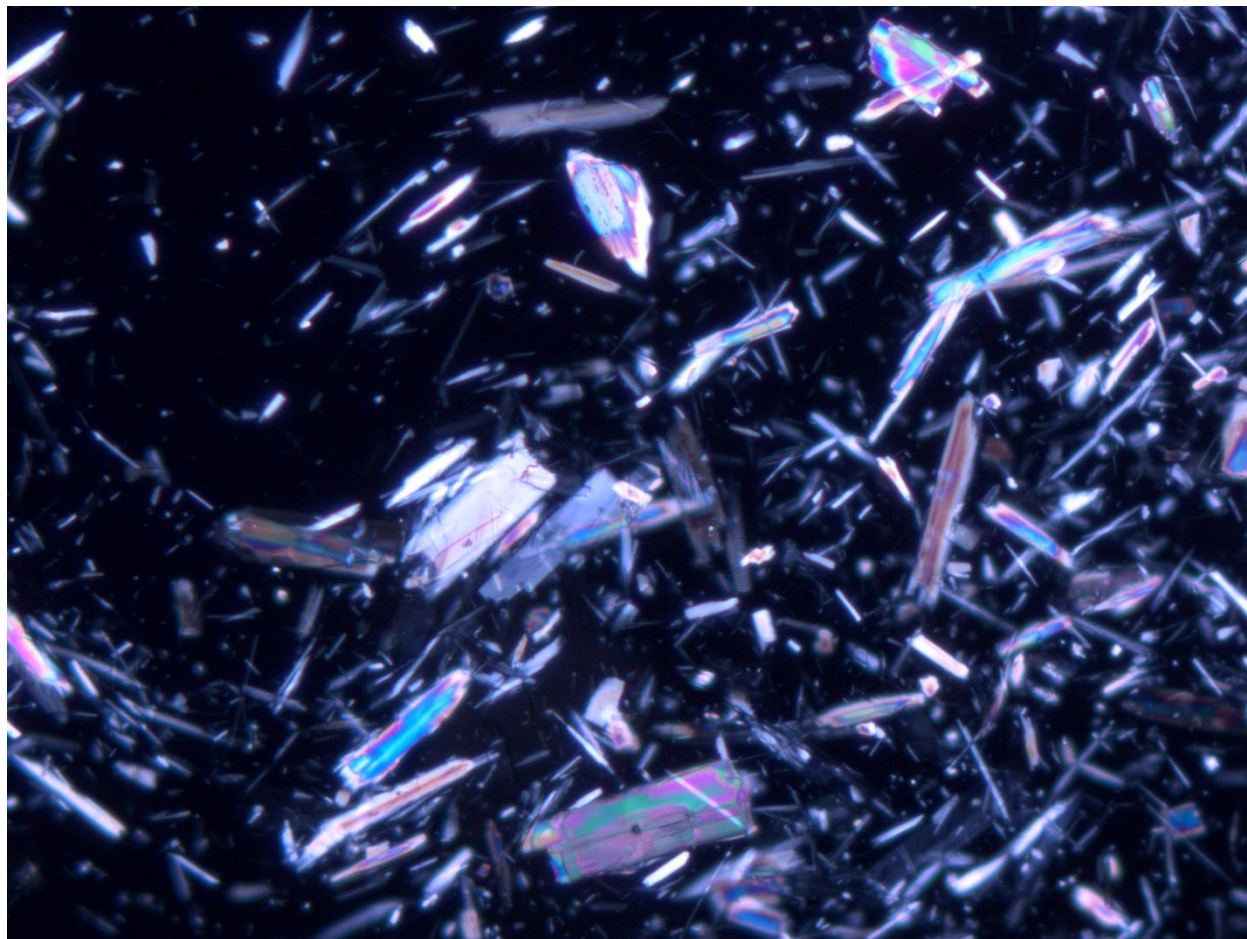

**Figure S12.** Optical microscope image of crystalline 1:1 ibuprofen in  $C_4NH_2$ .



## Tuning the Physicochemical Properties of n-Butylammonium Acetate through Ion Oligomerization

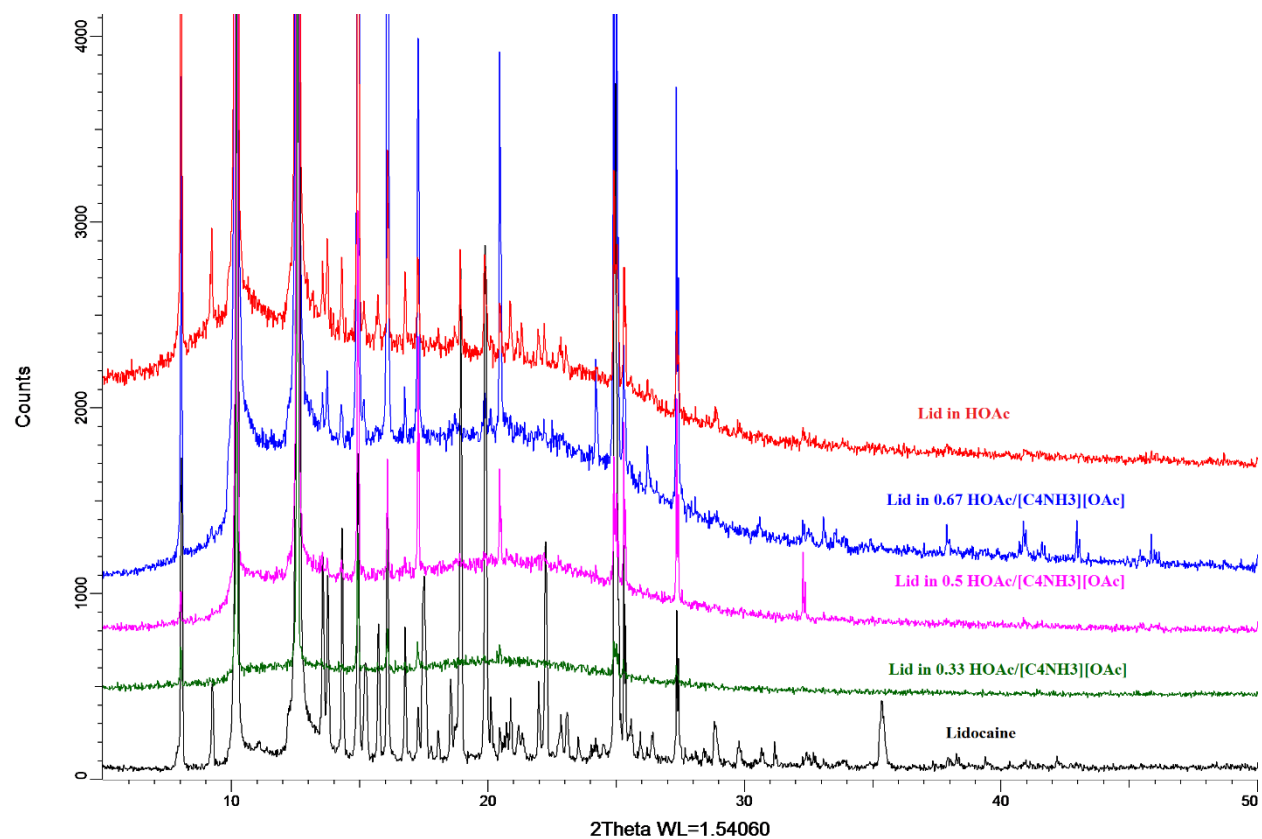

**Figure S13.** PXRD diffractograms of solids obtained when lidocaine was added to HOAc or to mixtures of  $[C_4NH_3][OAc]$  + HOAc.
